# Supplementary material for: Site-directed conjugation of single-stranded DNA to affinity proteins: quantifying the importance of conjugation strategy
Source: Chem Sci. 2024 May 7;15(23):8982–92. doi: 10.1039/d4sc01838a (PMC11168188; doi:10.1039/d4sc01838a)
Supplement: SC-015-D4SC01838A-s002 [file SC-015-D4SC01838A-s002.pdf]

## List of Figures

|                                                 |           |
|-------------------------------------------------|-----------|
| <b>Protein–ssDNA Conjugation</b>                | <b>G1</b> |
| Main Text Figure 1                              | G1        |
| SI Figure S4 Panel A                            | G1        |
| SI Figure S4 Panel B                            | G1        |
| SI Figure S5                                    | G2        |
| SI Figure S7                                    | G2        |
| <b>The impact of DNA length on HER2 binding</b> | <b>G3</b> |
| Main Text Figure 3                              | G3        |
| <b>ImmunoPCR</b>                                | <b>G3</b> |
| SI Figure S11                                   | G3        |
| <b>Cytometry and cell staining</b>              | <b>G4</b> |
| SI Figure S13                                   | G4        |

# Protein–ssDNA Conjugation

## Main Text Figure 1

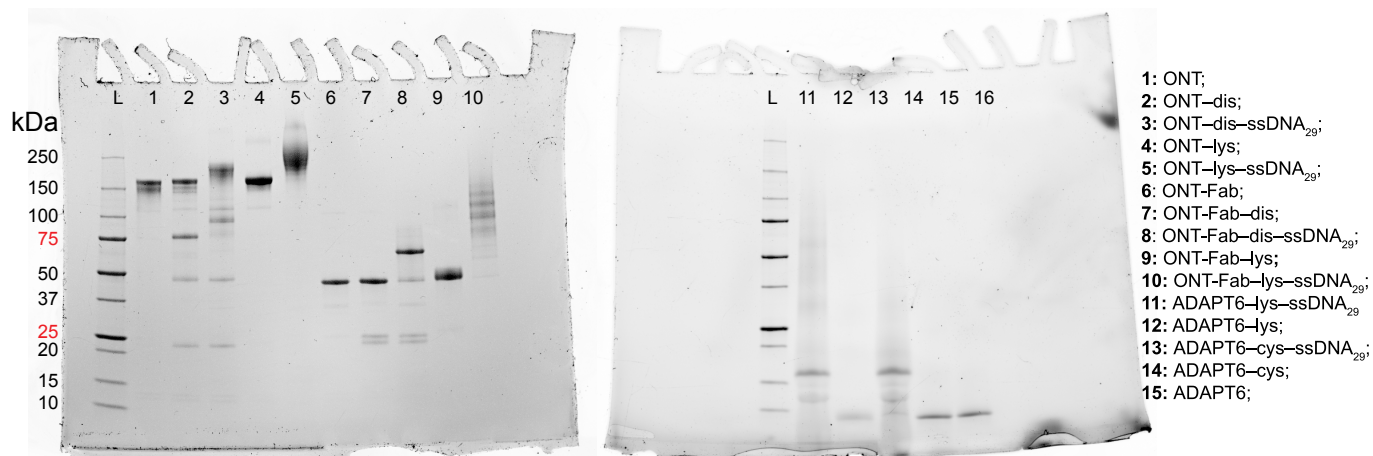

**Figure G1.** Un-cropped SDS-PAGE images for the analysis of ONT, ONT-Fab and ADAPT6 modified structures.

## SI Figure S4 Panel A

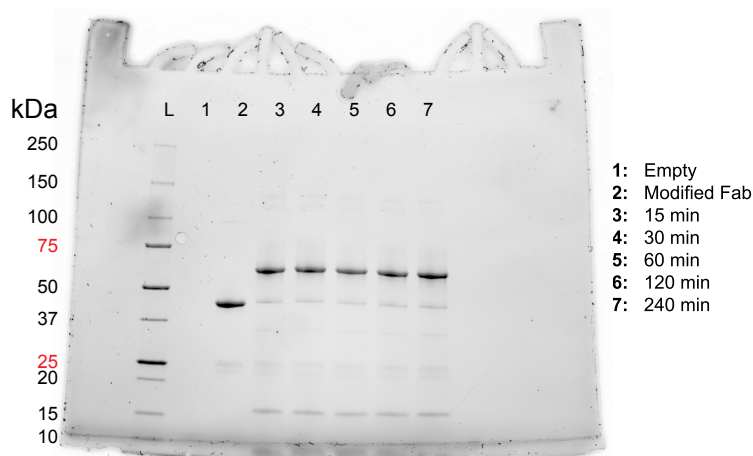

**Figure G2.** Un-cropped SDS-PAGE image for the analysis of the reaction between ONT-Fab-dis and TCO-ssDNA<sub>29</sub>, monitored over time.

## SI Figure S4 Panel B

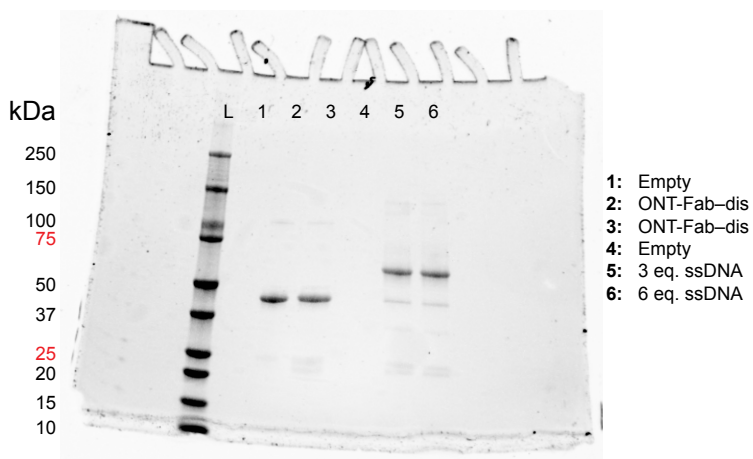

**Figure G3.** Un-cropped SDS-PAGE image for the analysis of the reaction between ONT-Fab-dis and TCO-ssDNA<sub>29</sub>, as a function of equivalents of ssDNA.

## SI Figure S5

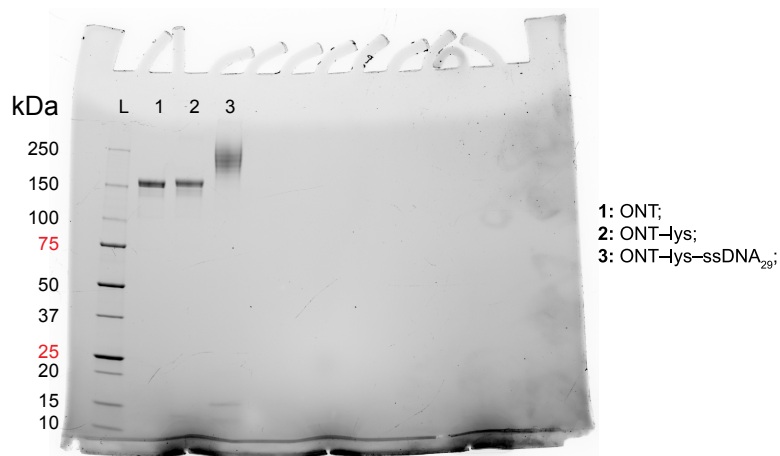

**Figure G4.** Un-cropped SDS-PAGE image(s) for the analysis of the heterogeneity of the non-specific conjugation to lysine residues. Specifically, image shows panel (i) in original figure. Panels (ii) and (ii) were extracted from images in Figure G1 from lanes 10 and 11 respectively.

## SI Figure S7

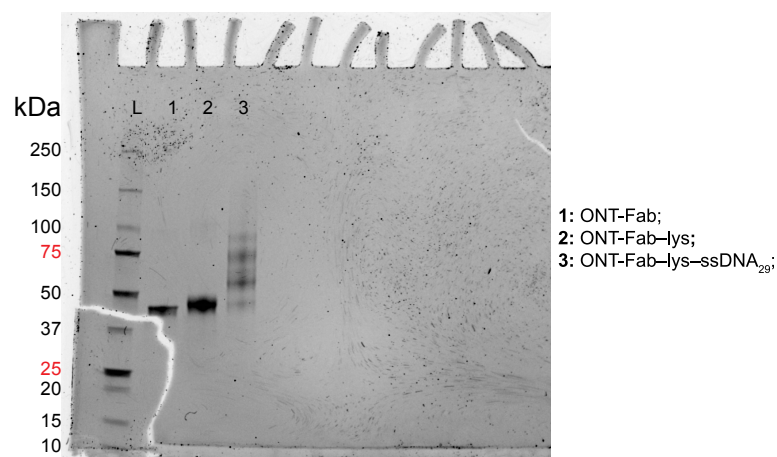

**Figure G5.** Un-cropped SDS-PAGE image for the analysis of the conjugation between ONT-Fab-lys and TCO-ssDNA<sub>29</sub>, with an average ssDNA:protein ratio of 1.35 : 1.

## The impact of DNA length on HER2 binding

### Main Text Figure 3

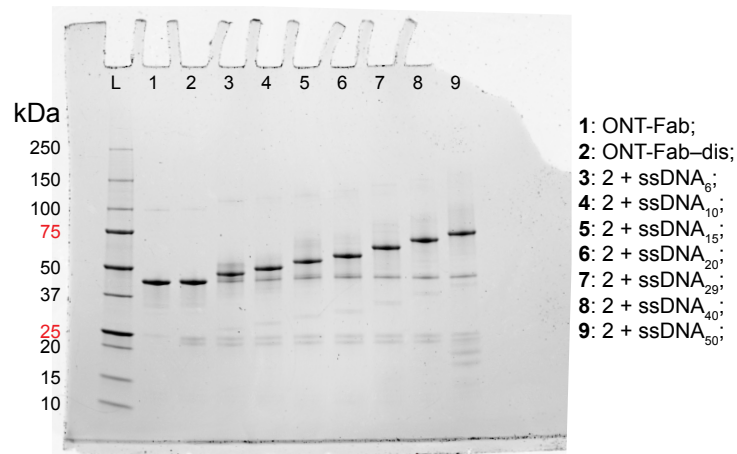

**Figure G6.** Un-cropped SDS-PAGE image for the analysis of ONT-Fab-ssDNA<sub>6-50</sub> conjugates.

## ImmunoPCR

### SI Figure S11

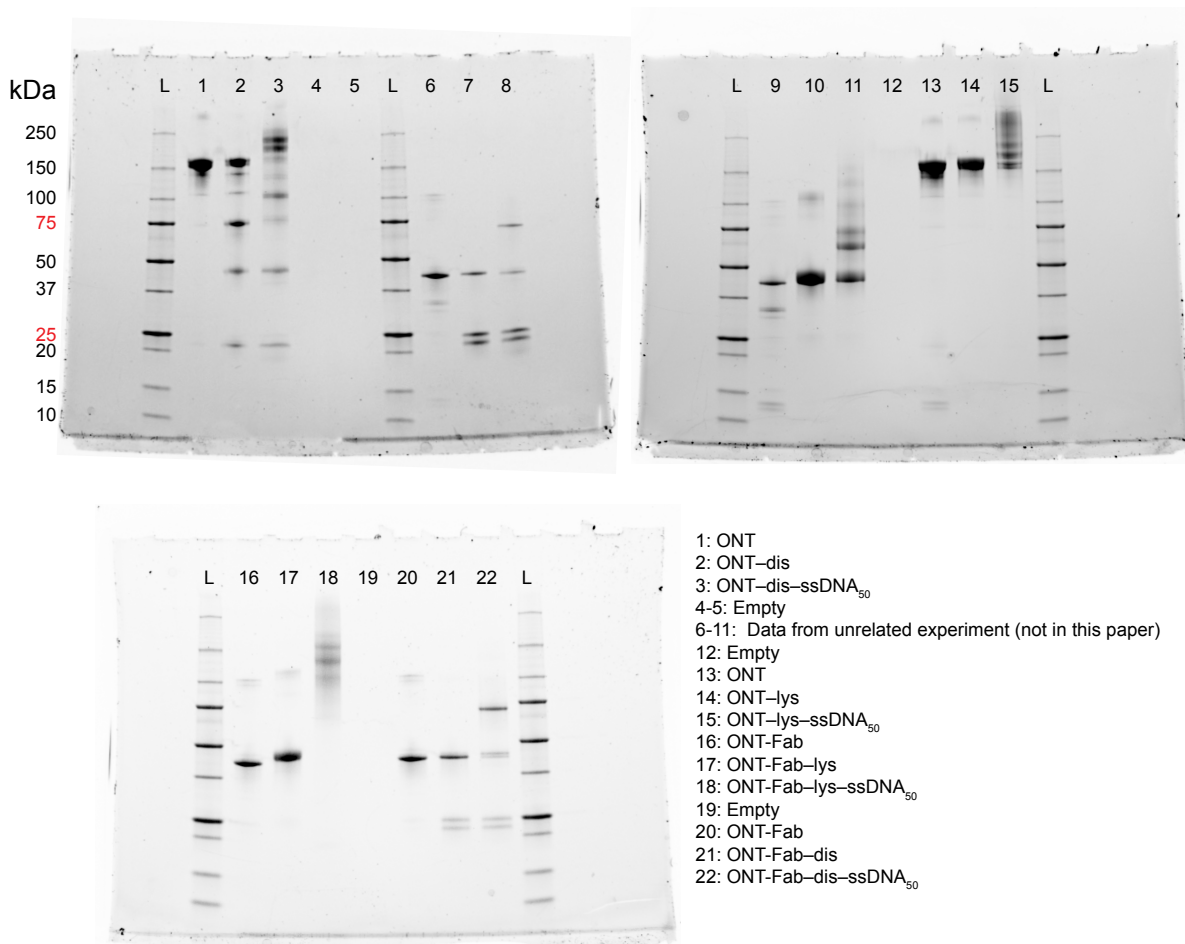

**Figure G7.** Un-cropped SDS-PAGE images for the analysis of Protein-ssDNA<sub>50</sub> conjugates for the immunoPCR experiments.

## Cytometry and cell staining

### SI Figure S13

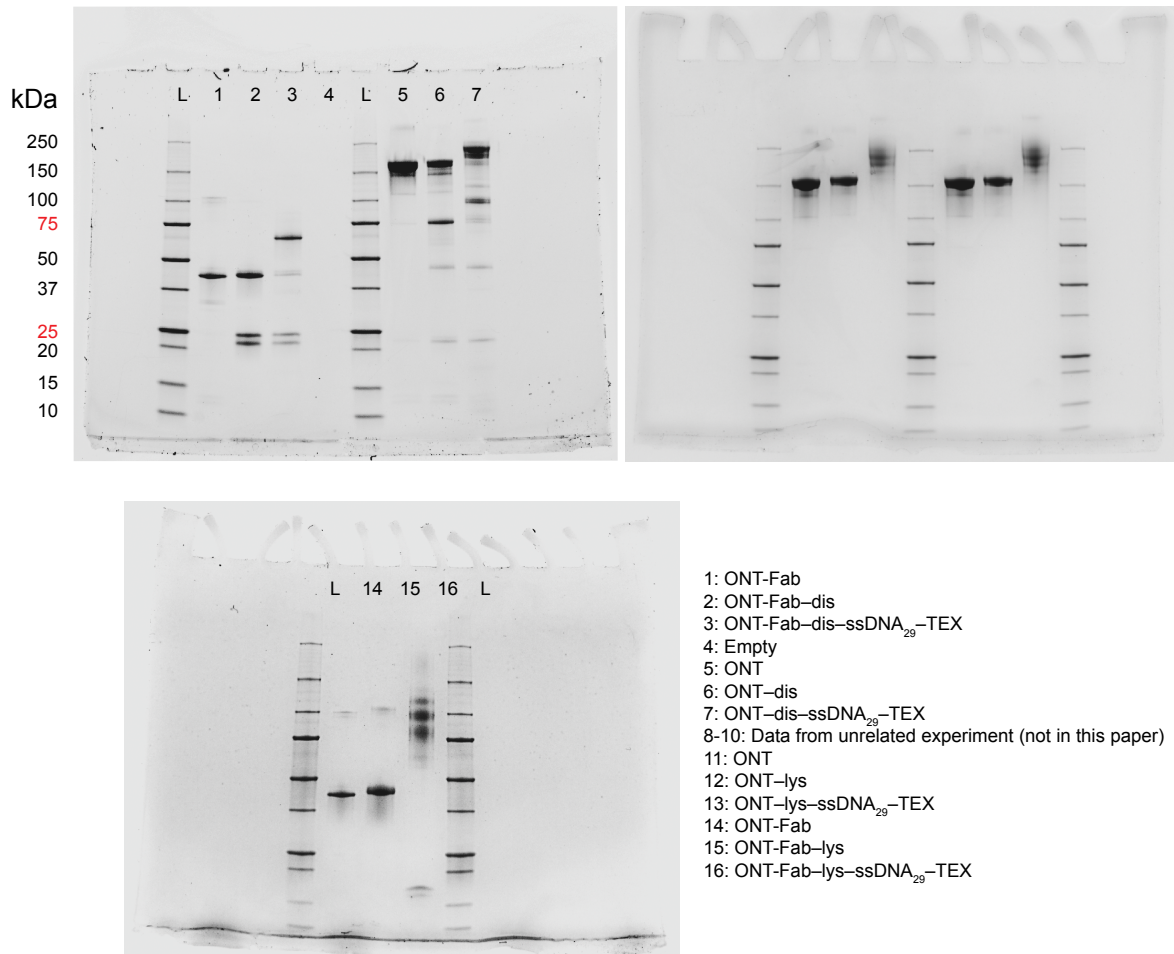

**Figure G8.** Un-cropped SDS-PAGE images for the analysis of Protein-ssDNA<sub>29</sub>-TEX conjugates for the cell flow cytometry and imaging experiments.
